# Supplementary material
Source: ML conference proceedings conference paper supplement (https://openreview.net/forum?id=Eccx2-_vZS4)

Dataset 1

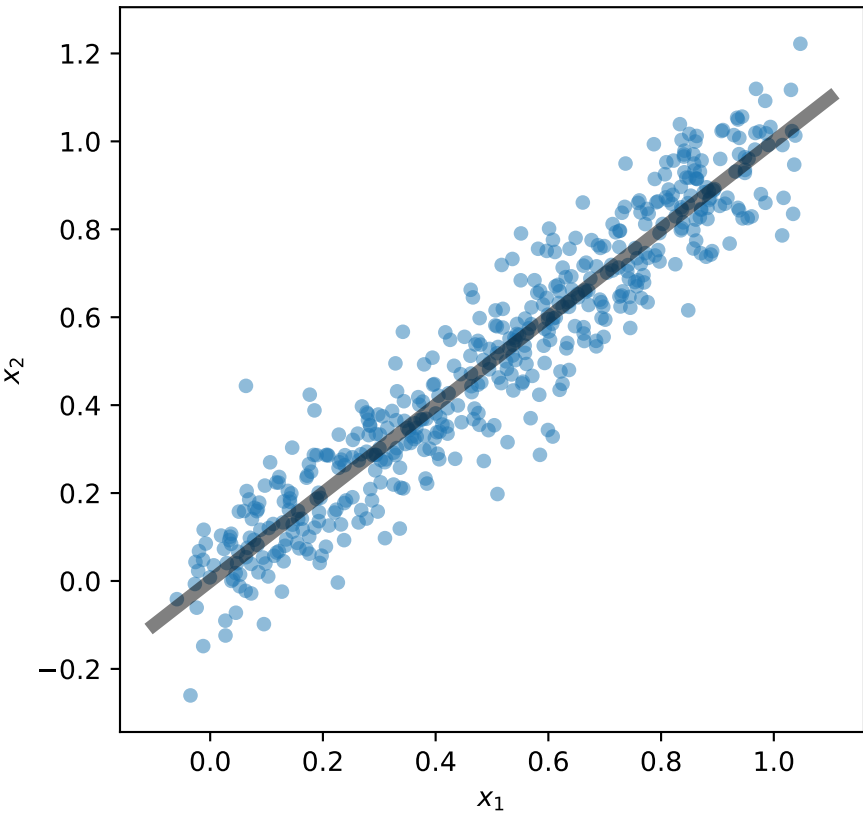

Supplement: supplementary_material [file attachment]

Dataset 2

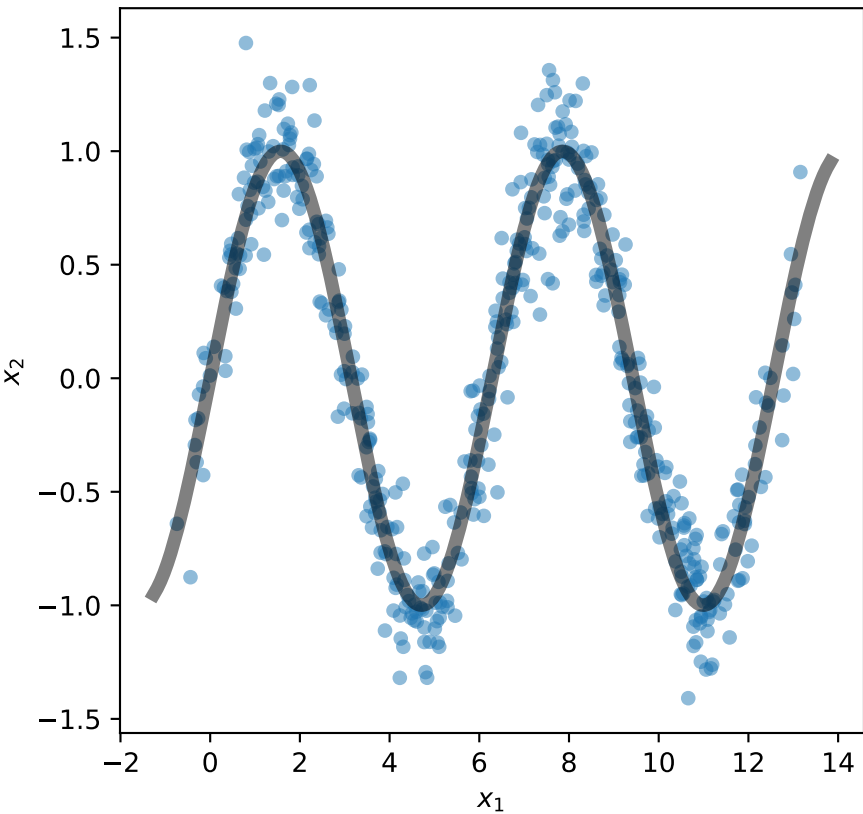

Supplement: supplementary_material [file attachment]

Dataset 3

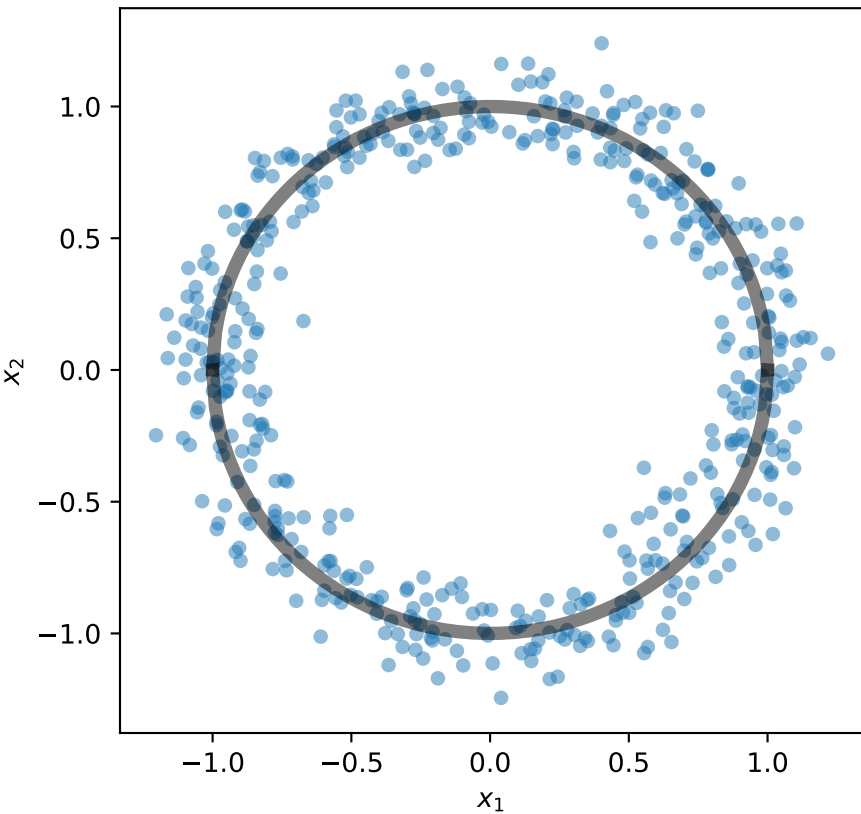

Supplement: supplementary_material [file attachment]
